# Supplementary material for: Taxane resistance in prostate cancer is mediated by decreased drug-target engagement
Source: JCI journal article supplement (doi:10.1172/jci132184), 2020-05-18
Supplement: sd1 [file 1]

Figure S1

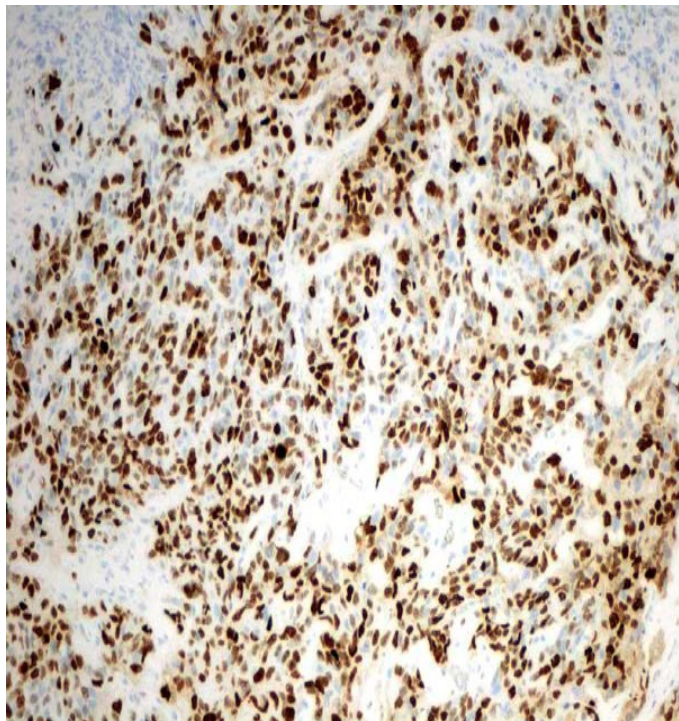

CWR22RV1 76%  
Ki-67

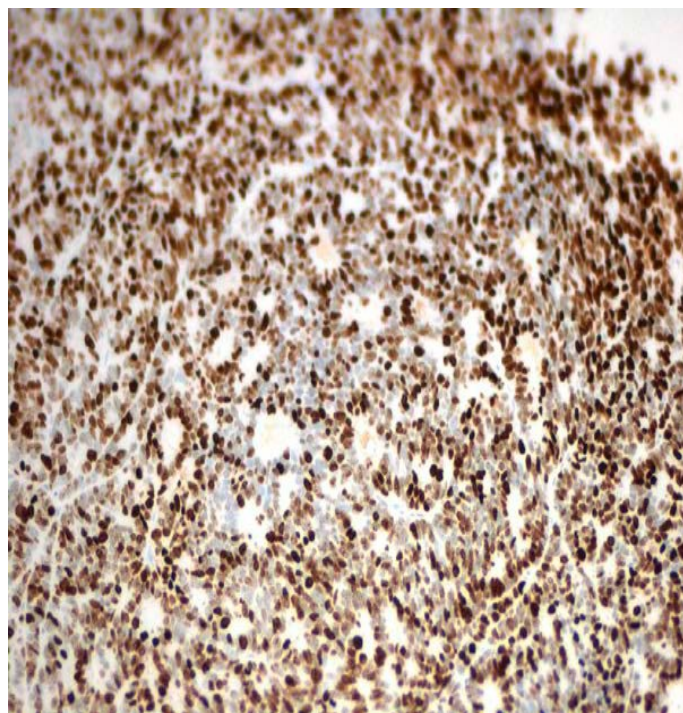

VCaP 75%  
Ki-67

S1. Baseline Ki-67 staining of untreated xenografts from CWR22Rv1 and VCaP show Ki-67 percentage of 76% and 75%, respectively.

Figure S2

### LuCaP35CR

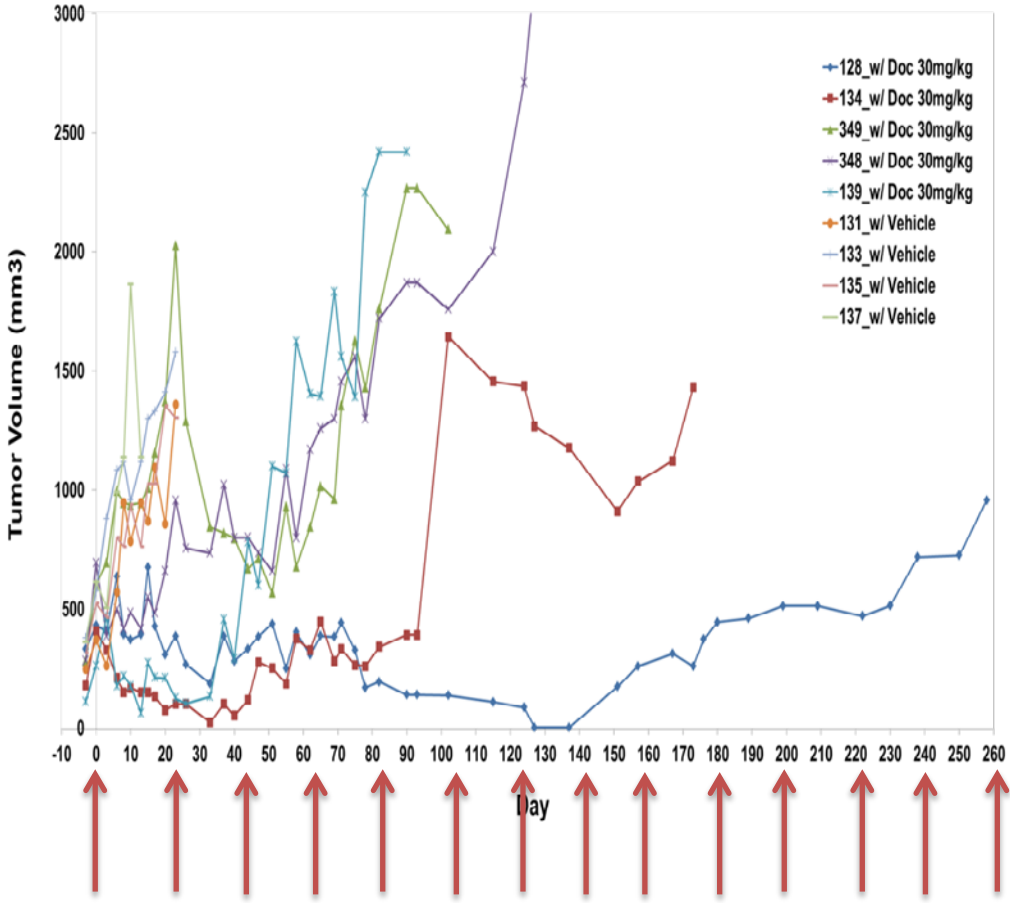

**30 mg/kg Docetaxel, i.p., once every three weeks as 1 cycle, 4~12 cycles**  
**Vehicle, i.p. 1-2 cycles**

S2. Individual tumor growth curves of mice treated with vehicle or docetaxel. Tumor growth curves from 35LuCaP patient derived xenografts. Tumors 128 and 134 were long term responders to docetaxel. Tumors 349, 348 and 139 developed resistance to treatment and tumors were harvested 3 days after the last dose of docetaxel. The remaining tumors were untreated and only given a dose of docetaxel 3 days prior to sacrifice. These tumors were considered the sensitive tumors.

Figure S3

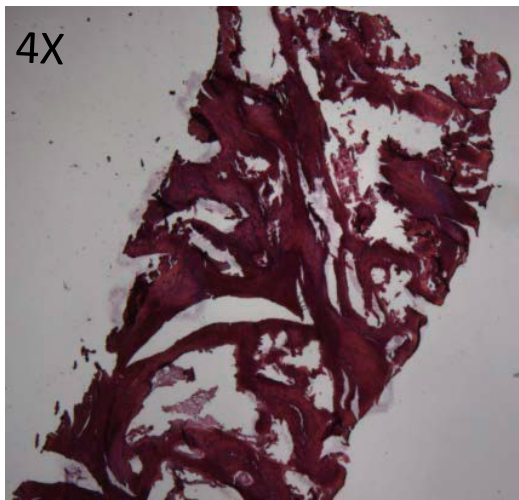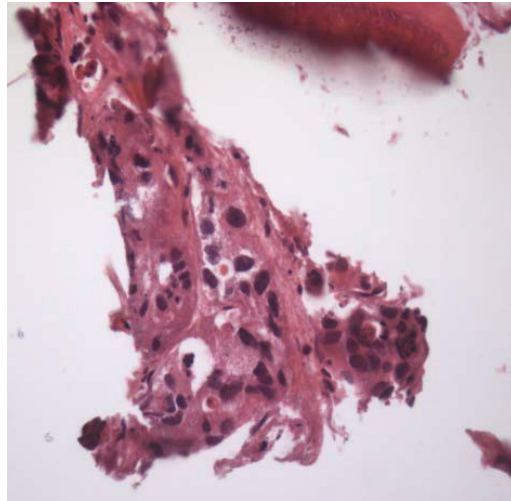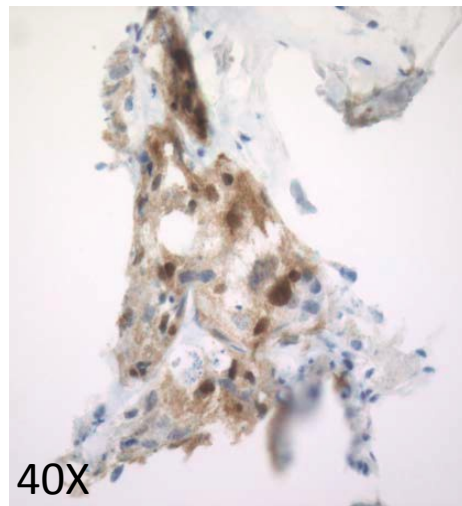

S3. Representative H&E of a bone biopsy (4X and 40X) is shown as well as AR IHC of the same biopsy specimen.



Figure S4

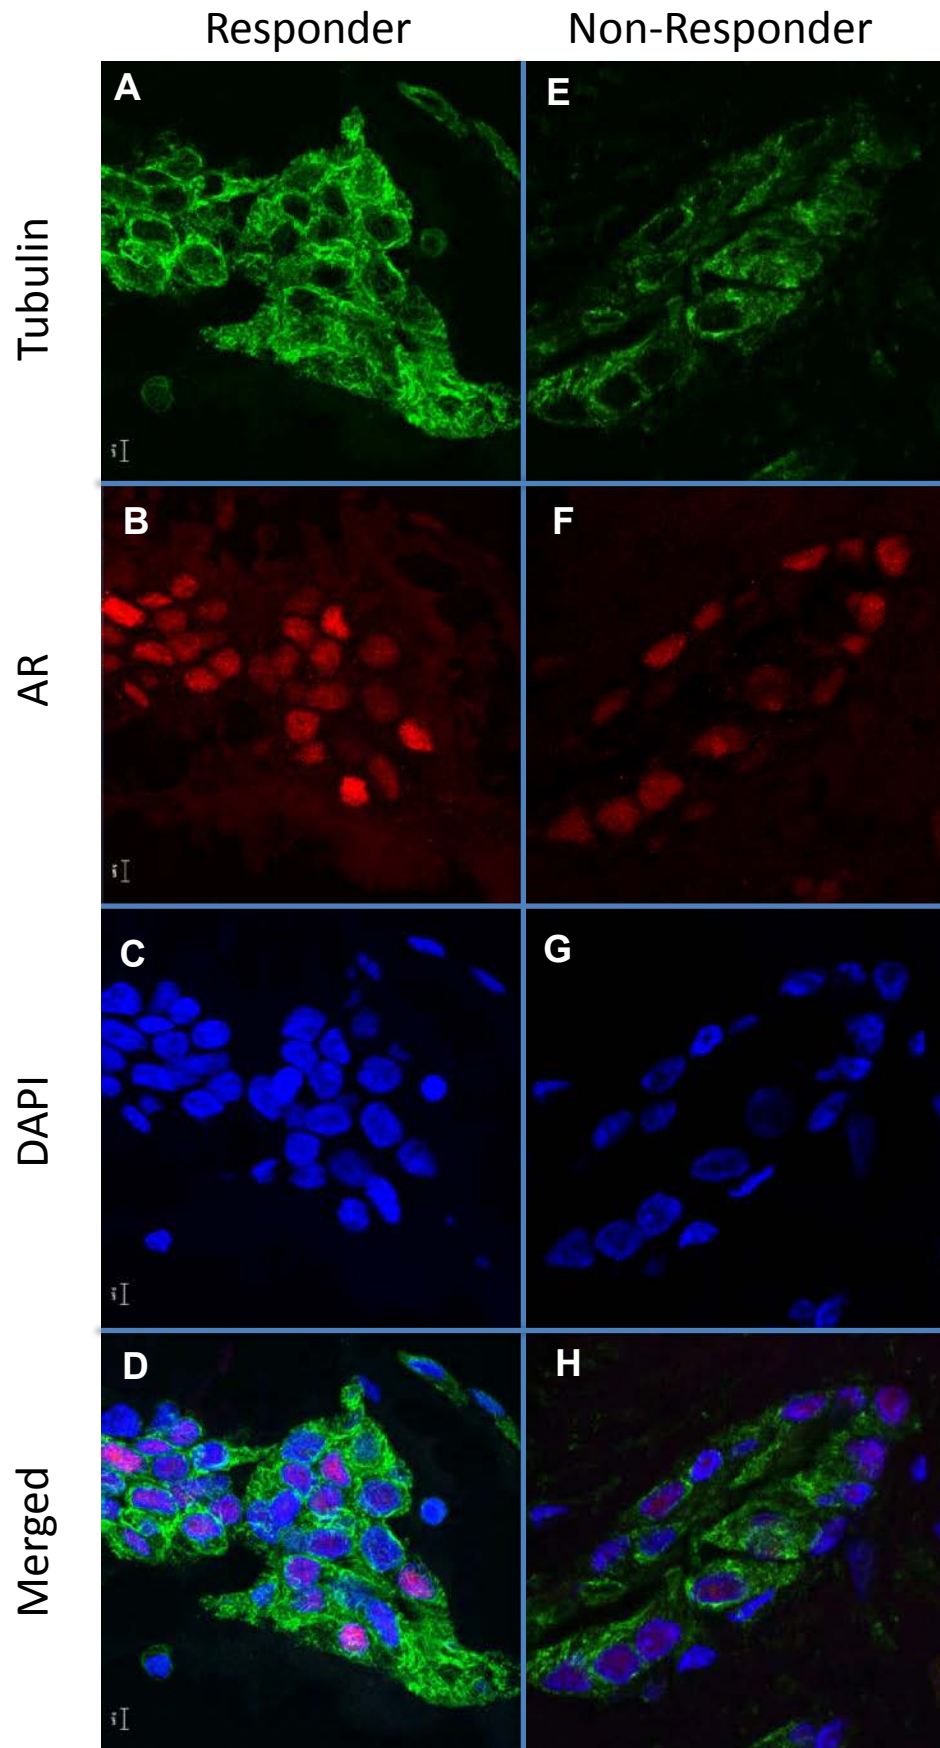

S4. Representative IF for tubulin and AR is shown in a non-responder (A-D) versus a responder (E-H) in biopsies taken 2-3 days after initial taxane treatment.

Figure S5

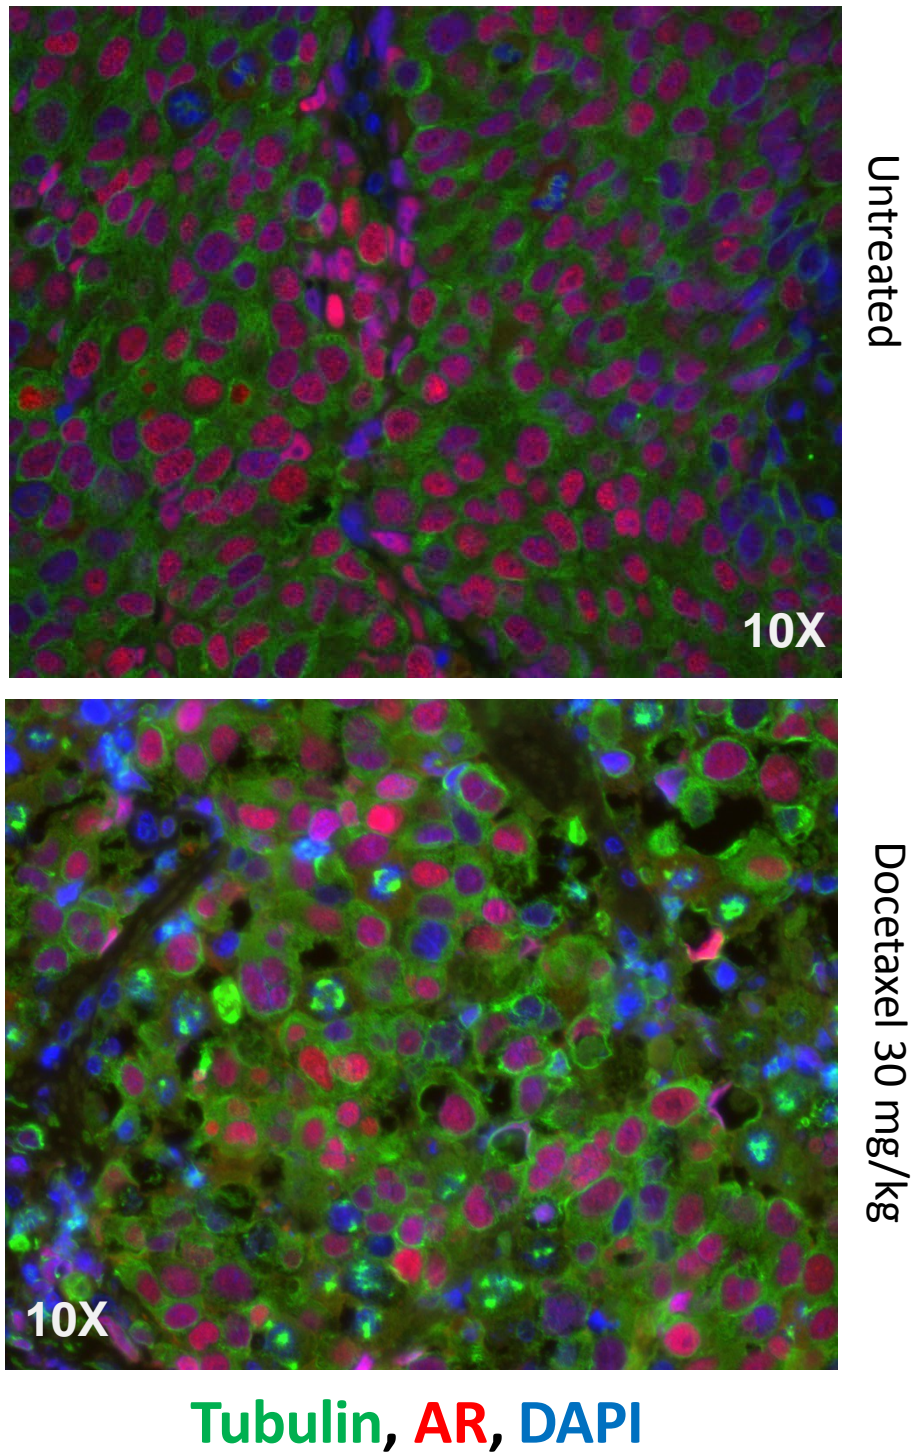

S5. Dual IF for tubulin and AR is shown in untreated and docetaxel treated xenografts.



# Figure S6A

## A LuCaP 35CR

A

Sensitive tumor  
Biopsy  
Before treatment

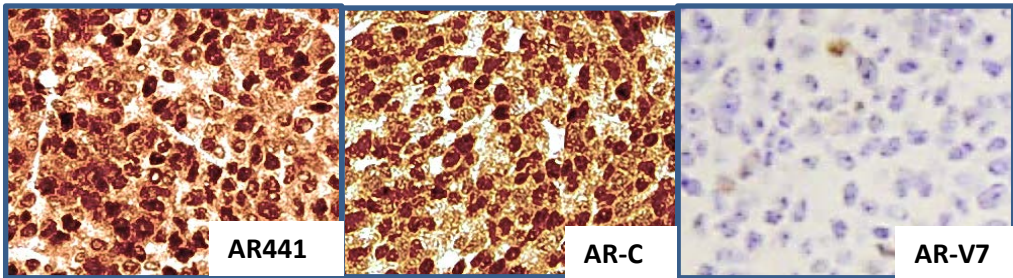

Sensitive tumor  
after 3 day DOC  
treatment

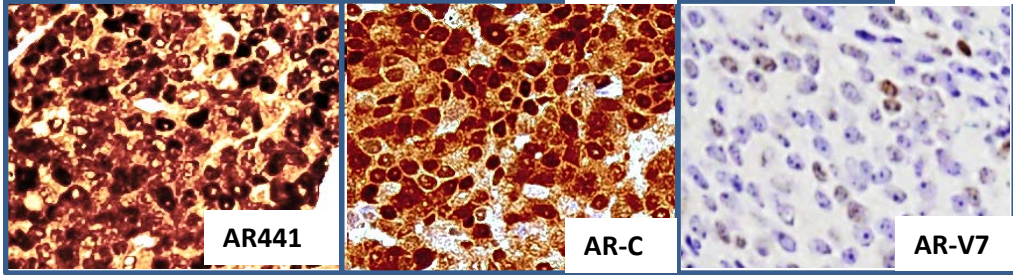

B

Resistant tumor  
Biopsy  
Before treatment

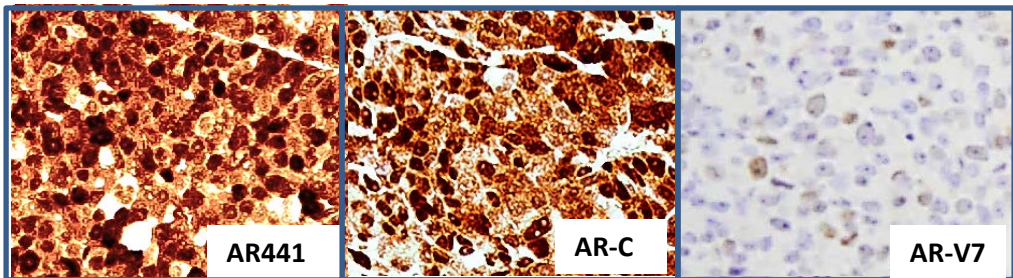

Resistant tumor  
after 3 day  
treatment

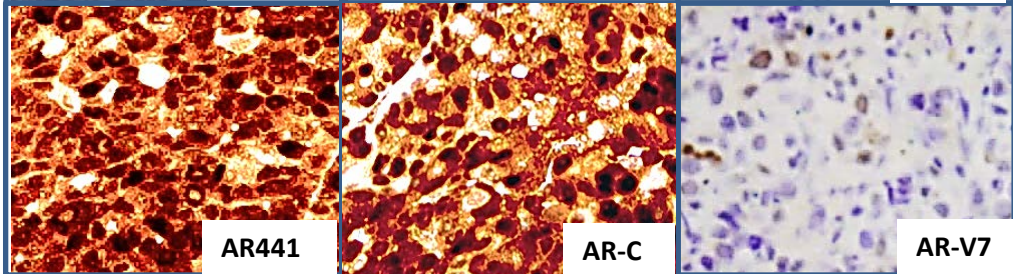

Figure S6A. Representative IHC of the status of full length AR and ARV7 in the docetaxel sensitive (A) and resistant (B) LuCaP 35CR tumors. Both sensitive tumor and resistant tumor were biopsied before treatment and subsequently treated with docetaxel for 3 days. After 3 days of treatment, tumors were harvested. The FFPE biopsy and tumor sections were stained with antibodies for N-terminal AR, C-terminal AR and ARV7.



Figure S6B

C

LuCaP 96CR

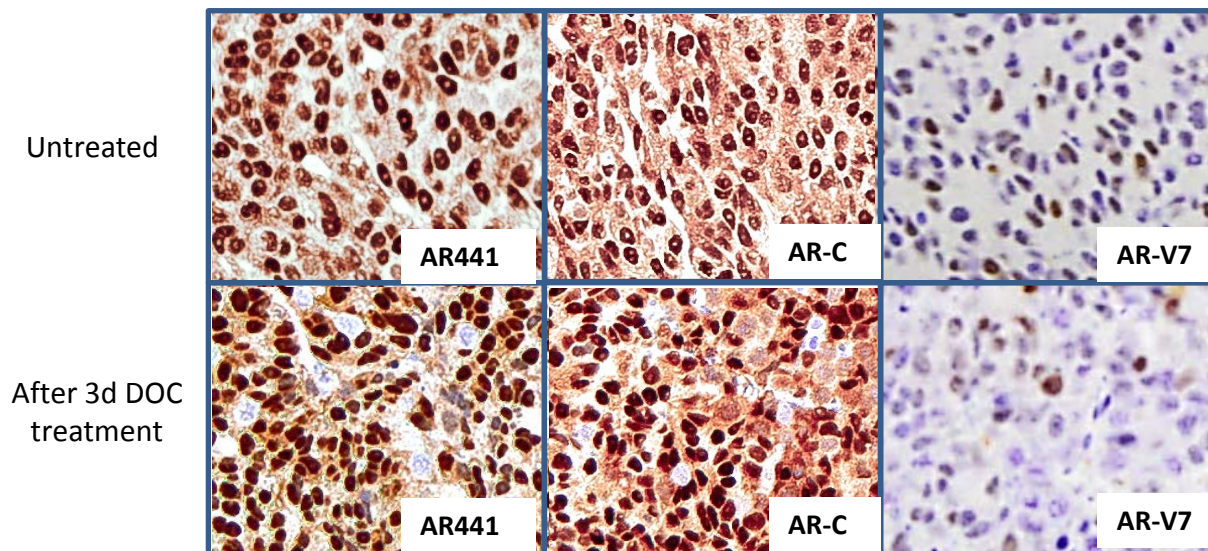

D

22Rv1

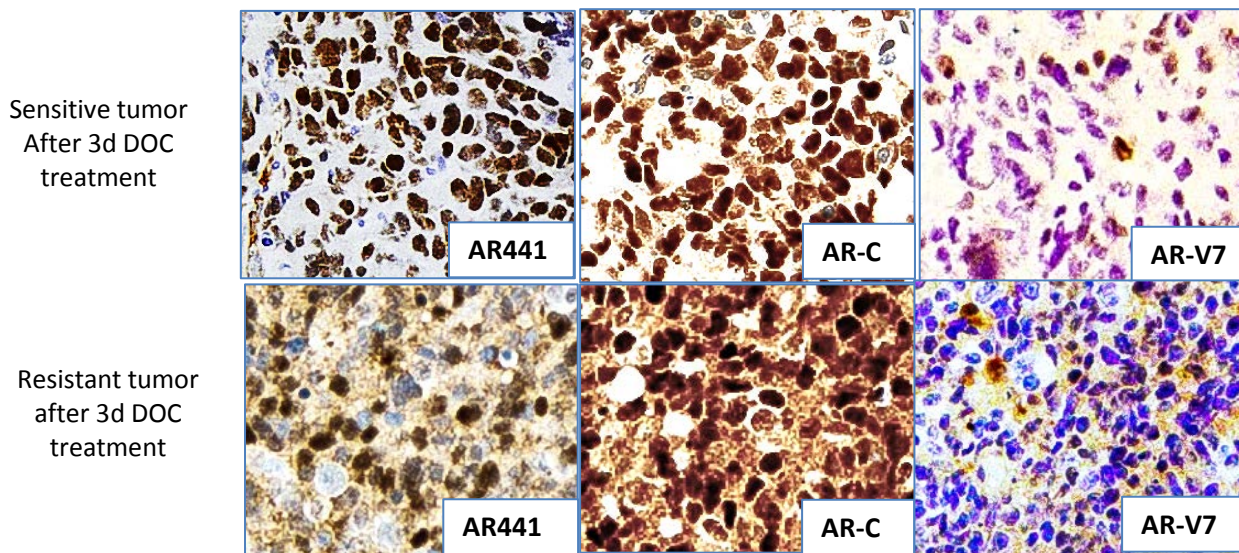

Figure S6B. Representative IHC of the status of full length AR and ARV7 in the LuCaP96CR (C) tumors, 22Rv1 (D) and DOC (untreated) were harvested. The remaining mice were treated with 3 days of docetaxel (DOC). IN the 22Rv1 model, mice bearing sensitive and resistant tumors were treated with DOC for 3 days and tumors harvested. The tumor sections were stained for N-terminal AR, C-terminal AR and ARV7..



Figure S7

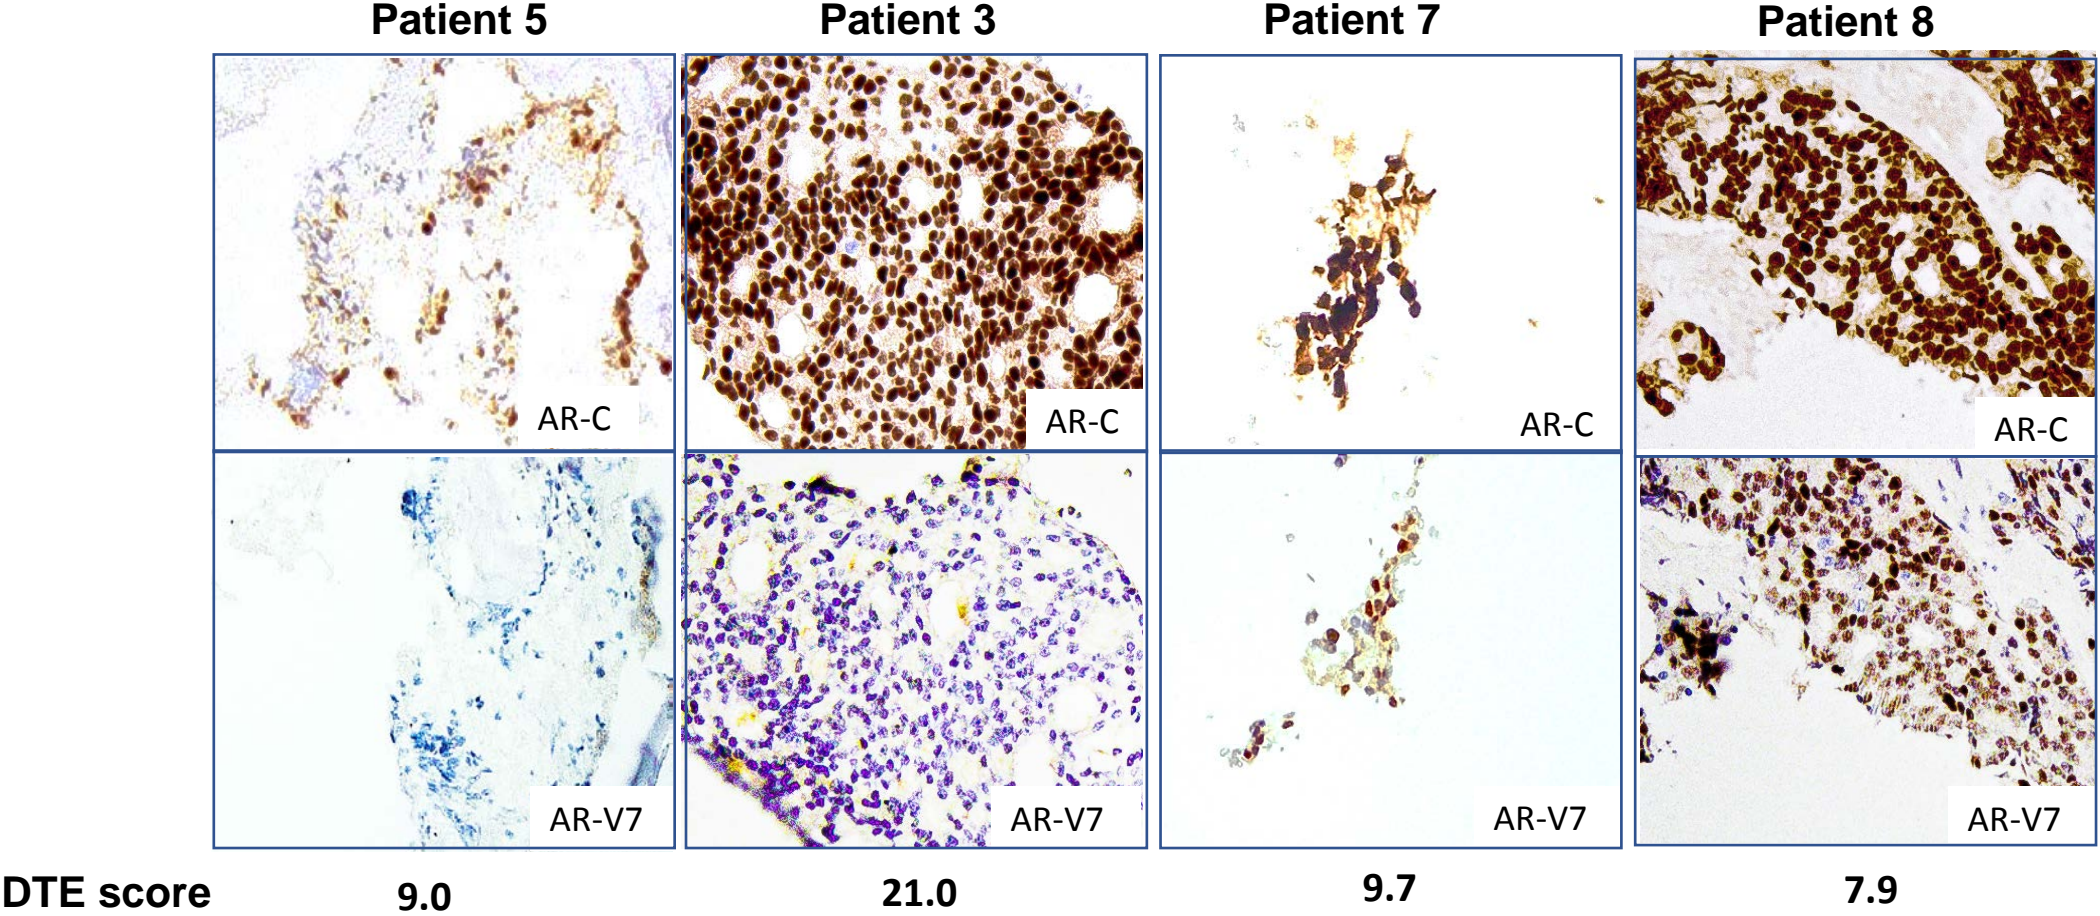

Figure S7. Representative IHC of full length AR and ARV7 in biopsies of patients treated with taxanes (Table 1). FFPE tumor sections were stained with AR441 antibody (Santa Cruz, sc-7305 ) for N-terminal AR, C-terminal AR and ARV7 respectively. The DTE scores are indicated for each patient.

Figure S8

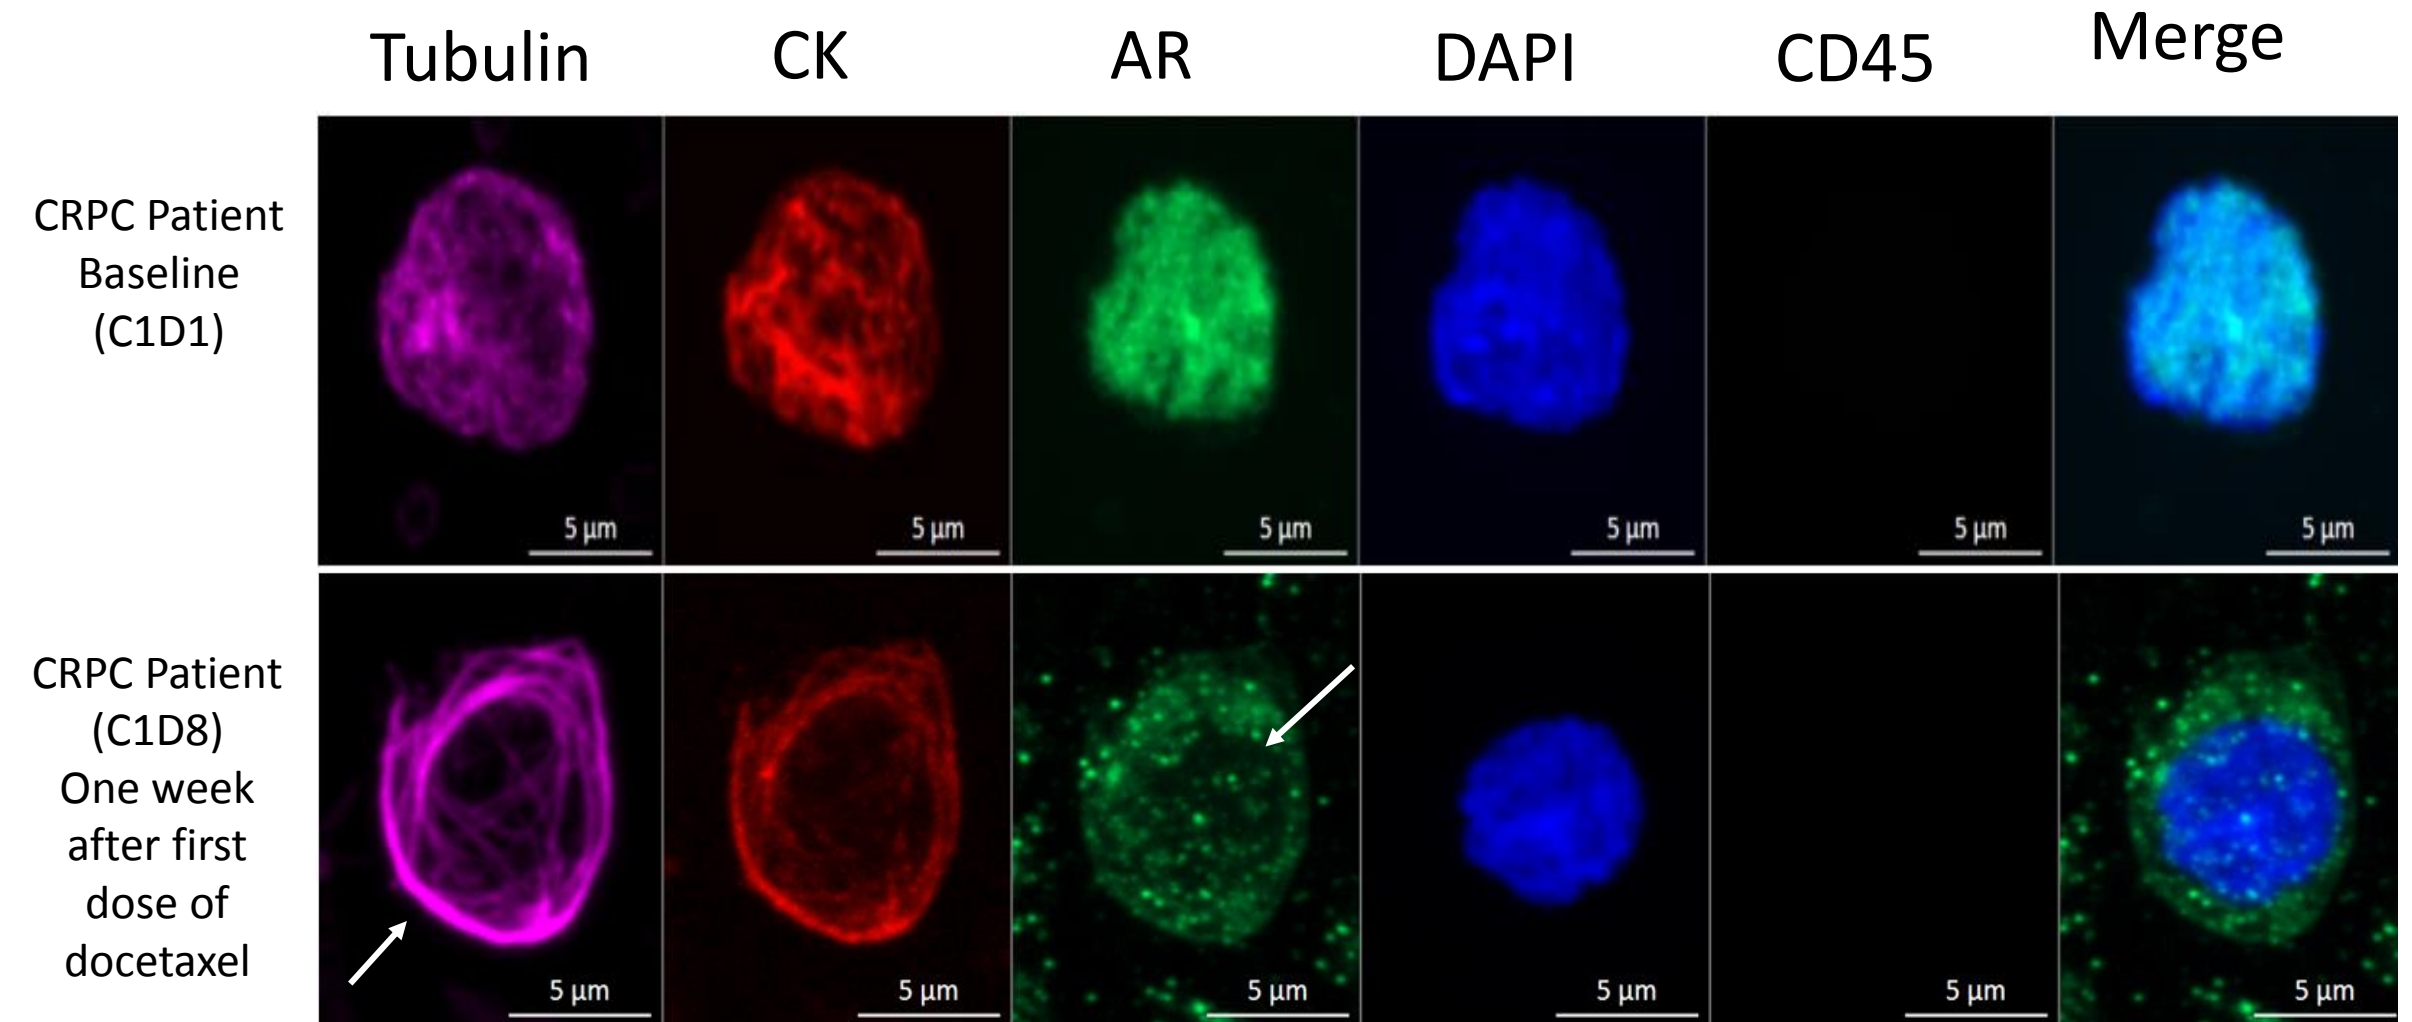

Figure S8. CTCs were defined as nucleated (DAPI+), pan-CK+, CD45- cells. Tubulin and AR staining was performed to address DTE. Arrows point to MT-bundling and decreased nuclear AR.
